# Supplementary material for: First hexanuclear zirconium macrocycle sustained in a chair-like conformation by glycolic acids
Source: Royal Society of Chemistry journal article supplement (doi:10.1039/b912160a), 2009-01-01

Supplemental Materials to Accompany the Communication  
Entitled:

## First hexanuclear zirconium macrocycle in a chair-like confirmation sustained by glycolic acids

Michael Fitzgerald,<sup>a</sup> Iraklis Pappas,<sup>a</sup> Chong Zheng,<sup>b</sup> Zai-Lai Xie,<sup>c</sup> Xiao-Ying Huang,<sup>c</sup> Songtao Tao,<sup>d</sup> Long Pan<sup>\*a</sup>

<sup>a</sup> Colgate-Palmolive Company, 909 River Road Piscataway, NJ 08854, USA; Tel: (001) 732-878-7640; E-mail: longrutgers@yahoo.com

<sup>b</sup> Department of Chemistry and Biochemistry, Northern Illinois University, DeKalb, Illinois 60115, USA,

<sup>c</sup> State Key Laboratory of Structural Chemistry, Fujian Institute of Research on the Structure of Matter, Chinese Academy of Sciences, Fuzhou, Fujian 350002, P. R. China

<sup>d</sup> College of Physics and Electronic Information, Anhui Normal University, Wuhu 241000, China

**Figure S1:** structure of  $ZrOCl_2$  indicating how  $A^4$  and  $B^2$  units can form a square. Color Code: Light Blue, Zr; Red, O.

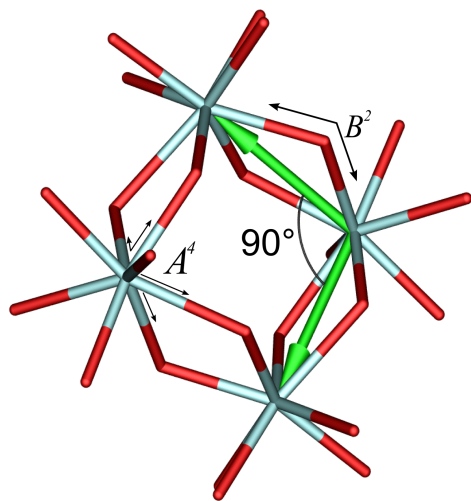

**Figure S2:** structure of CP-3 indicating how  $A^4$  and  $B^2$  units can form a hexagon. Color Code: Light Blue, Zr; Red, O.

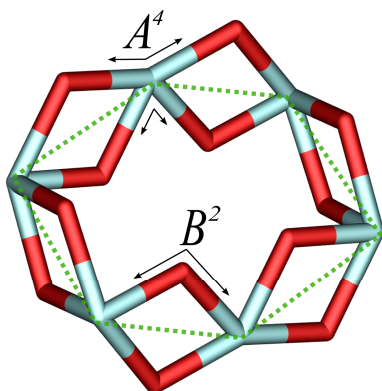

**Figure S3.** MOOP's of the Zr-Zr and Zr-O (bridging) bonds calculated for the Zr crown structure.

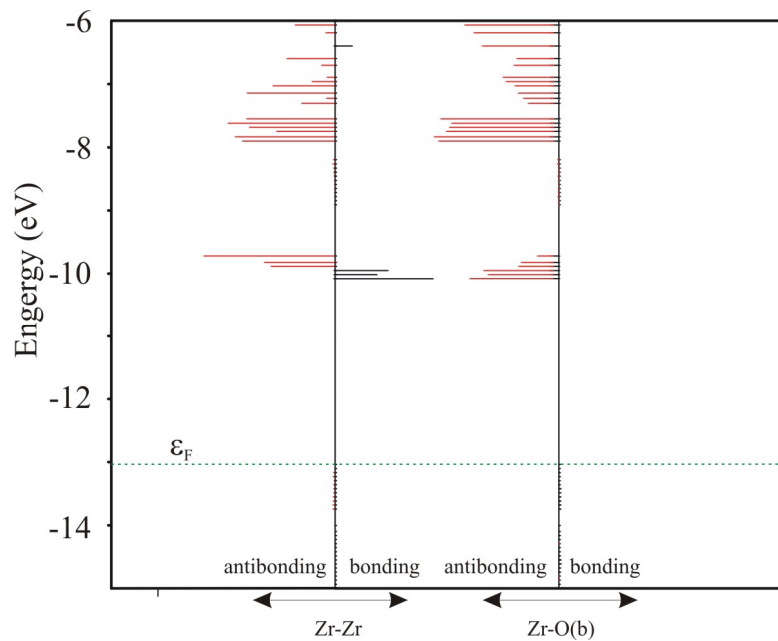

**Figure S4:** IR spectrum of CP-3

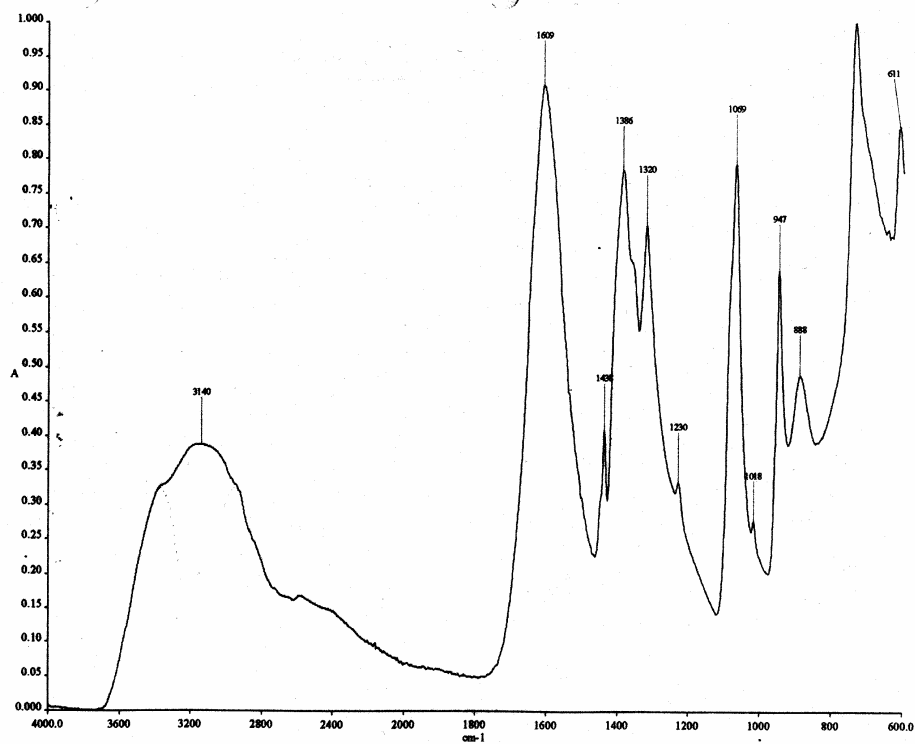

**Figure S5:** The PXRD patterns of two batches of CP-3 (Blue, Green) compared with a simulated XRD pattern (red).

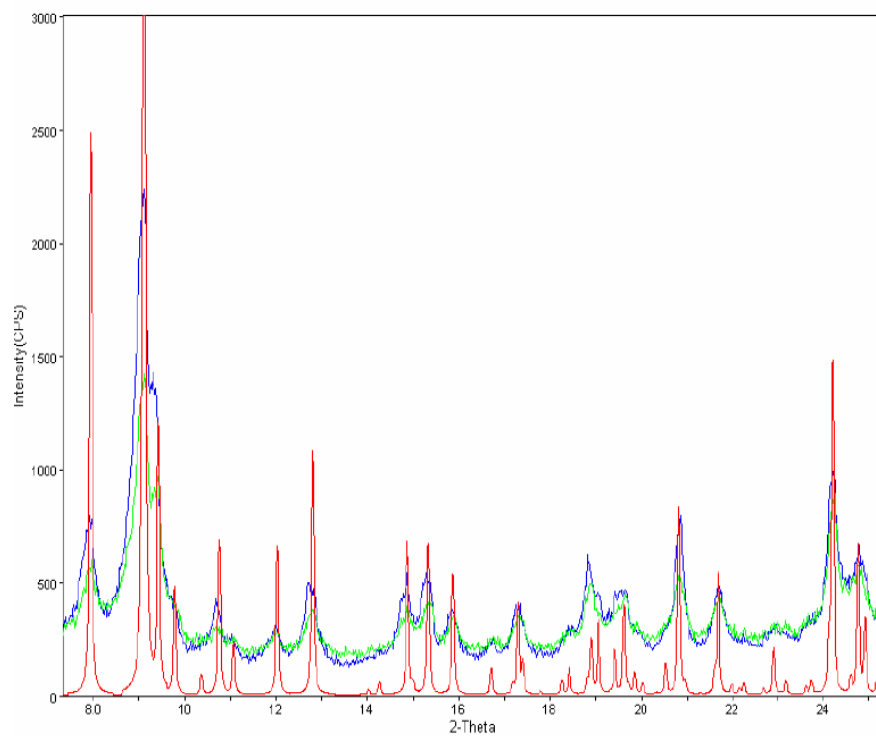

Supplement: b912160a.pdf [file b912160a.pdf]
